# Supplementary material
Source: PubMed Central journal article supplement (PMC6949817)
Supplement: ijcep0012-3185-f9.pdf [file ijcep0012-3185-f9.pdf]

# CBF $\beta$ /RUNX3-miR10b-TIAM1 molecular axis inhibits GC

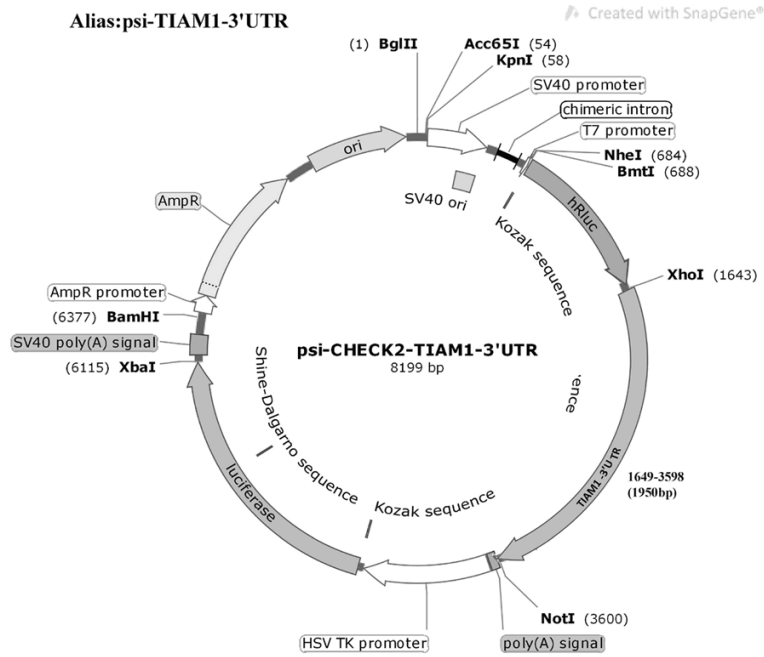

**Figure S1.** The vector map of psi-TIAM1-3'-UTR.

**Table S1.** Related online databases

| No. | Database Name | Web site address                                                                                                                                                                                |
|-----|---------------|-------------------------------------------------------------------------------------------------------------------------------------------------------------------------------------------------|
| 1   | Targetscan    | <a href="http://www.targetscan.org/vert_71/">http://www.targetscan.org/vert_71/</a>                                                                                                             |
| 2   | miRNet        | <a href="http://www.mirnet.ca/">http://www.mirnet.ca/</a>                                                                                                                                       |
| 3   | miRWalk       | <a href="http://mirwalk.umm.uni-heidelberg.de/">http://mirwalk.umm.uni-heidelberg.de/</a>                                                                                                       |
| 4   | miRDB         | <a href="http://www.mirdb.org/">http://www.mirdb.org/</a>                                                                                                                                       |
| 5   | MicroT-CDS    | <a href="http://www.microna.gr/microT-CDS/">http://www.microna.gr/microT-CDS/</a>                                                                                                               |
| 6   | miRSystem     | <a href="http://mirsystem.cgm.ntu.edu.tw/">http://mirsystem.cgm.ntu.edu.tw/</a>                                                                                                                 |
| 7   | miRNAMap      | <a href="http://mirnamap.mbc.nctu.edu.tw/">http://mirnamap.mbc.nctu.edu.tw/</a>                                                                                                                 |
| 8   | miRTarBase    | <a href="http://mirtarbase.mbc.nctu.edu.tw/php/index.php">http://mirtarbase.mbc.nctu.edu.tw/php/index.php</a>                                                                                   |
| 9   | Tarbase_v8    | <a href="http://carolina.imis.athena-innovation.gr/diana_tools/web/index.php?r=tarbasev8%2Findex/">http://carolina.imis.athena-innovation.gr/diana_tools/web/index.php?r=tarbasev8%2Findex/</a> |
| 10  | miRecord      | <a href="http://c1.accurascience.com/miRecords/">http://c1.accurascience.com/miRecords/</a>                                                                                                     |
| 11  | RNA22         | <a href="https://cm.jefferson.edu/rna22/">https://cm.jefferson.edu/rna22/</a>                                                                                                                   |
| 12  | PicTarvet     | <a href="http://www.pictar.org/">http://www.pictar.org/</a>                                                                                                                                     |
| 13  | Targetminer   | <a href="https://www.isical.ac.in/~bioinfo_miu/targetminer20.htm">https://www.isical.ac.in/~bioinfo_miu/targetminer20.htm</a>                                                                   |
| 14  | miRcode       | <a href="http://www.mircode.org/">http://www.mircode.org/</a>                                                                                                                                   |
| 15  | miRCancer     | <a href="http://mircancer.ecu.edu/">http://mircancer.ecu.edu/</a>                                                                                                                               |
| 16  | EVpedia       | <a href="http://student4.postech.ac.kr/evpedia2_xe/xe/">http://student4.postech.ac.kr/evpedia2_xe/xe/</a>                                                                                       |
| 17  | SomaniRDB2.0  | <a href="http://compbio.uthsc.edu/SomamiR/">http://compbio.uthsc.edu/SomamiR/</a>                                                                                                               |
| 18  | OncomiR       | <a href="http://www.oncomir.org/">http://www.oncomir.org/</a>                                                                                                                                   |
| 19  | HMDDv3.0      | <a href="http://www.cuilab.cn/hmdd/">http://www.cuilab.cn/hmdd/</a>                                                                                                                             |
| 20  | mir2Disease   | <a href="http://www.mir2disease.org/">http://www.mir2disease.org/</a>                                                                                                                           |
| 21  | miRTar        | <a href="http://mirtar.mbc.nctu.edu.tw/human/">http://mirtar.mbc.nctu.edu.tw/human/</a>                                                                                                         |
| 22  | BiBiServ      | <a href="https://bibiserv.cebitec.uni-bielefeld.de/rnahybrid/">https://bibiserv.cebitec.uni-bielefeld.de/rnahybrid/</a>                                                                         |

## CBFβ/RUNX3-miR10b-TIAM1 molecular axis inhibits GC

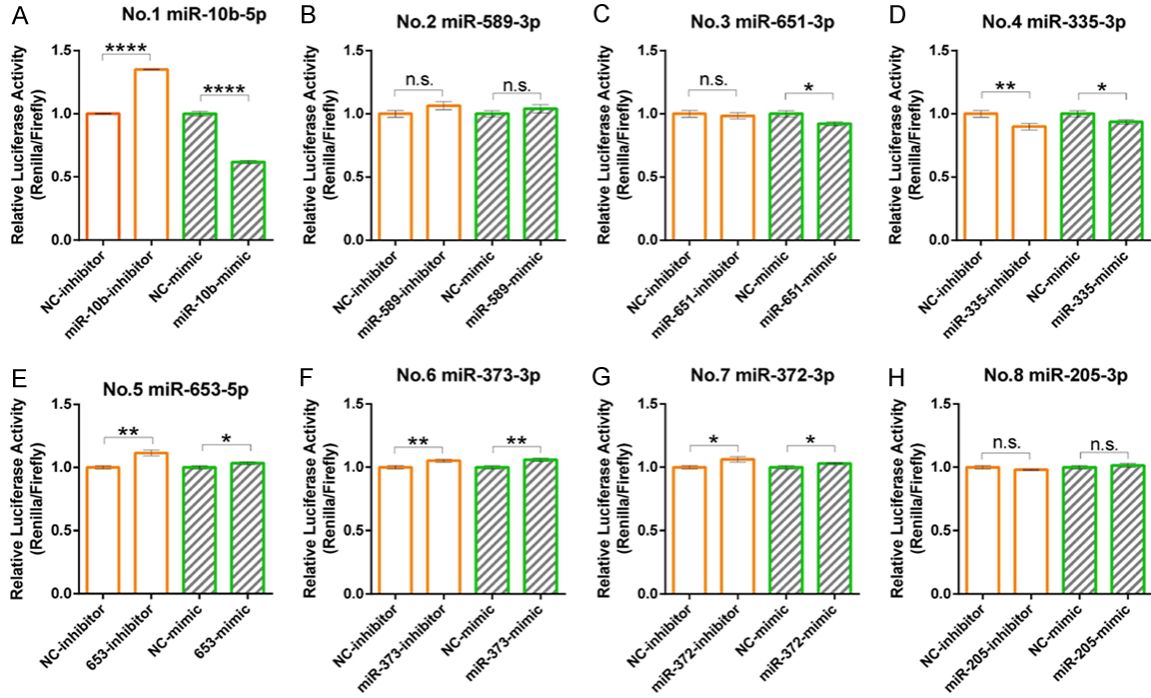

**Figure S2.** Of eight microRNAs experimentally confirmed to have an impact on TIAM expression, only miR-10b-3p directly targeted TIAM1 mRNA 3'-UTR. (A-H) Bar charts showing the relative luciferase activity after co-transfection with psi-TIAM1-3'-UTR and the mimcs/inhibitors of different microRNAs. Dual luciferase reporter assay results did not support a direct targeting relationship between microRNAs (B-H) and TIAM1 mRNA 3'-UTR with the exception of miR-10b-5p (A). \* $P < 0.05$ , \*\* $P < 0.01$ , \*\*\*\* $P < 0.0001$ , n.s.  $P > 0.05$ .
